# Supplementary material for: Ubiquilin Networking in Cancers
Source: PubMed Central journal article supplement (PMC7352256; doi:10.3390/cancers12061586), 2020-06-15
Supplement: cancers-12-01586-s001.pdf [file cancers-12-01586-s001.pdf]

## Supplementary Materials: The Ubiquilin Networking in Cancers

Salinee Jantrapirom, Luca Lo Piccolo, Dumnoensun Pruksakorn, Saranyapin Potikanond and Wutigri Nimlamool

**Table S1.** The Cancer Genome Atlas (TCGA) and non-TCGA studies for breast, lung, and ovary cancer were screened for amplification and/or deletions of *UBQLNs*. Only non-redundant studies were included in this analysis. The database stores 3116, 884, and 583 samples of breast, lung, and ovary cancer, respectively.

| Cancer | Genetic Variants           |                          |
|--------|----------------------------|--------------------------|
|        | Amplification              | Deletion                 |
| Breast | 8/3116 (0.26%) (UBQLN1)    | 0/3116 (0.0%) (UBQLN1)   |
|        | 15/3116 (0.48%) (UBQLN2)   | 1/3116 (0.03%) (UBQLN2)  |
|        | 20/3116 (0.68%) (UBQLN3)   | 15/3116 (0.48%) (UBQLN3) |
|        | 446/3116 (14.96%) (UBQLN4) | 0/3116 (0.0%) (UBQLN4)   |
| Lung   | 2/2884 (0.07%) (UBQLN1)    | 15/2884 (0.52%) (UBQLN1) |
|        | 12/2884 (0.42%) (UBQLN2)   | 19/2884 (0.66%) (UBQLN2) |
|        | 2/2884 (0.07%) (UBQLN3)    | 12/2884 (0.42%) (UBQLN3) |
|        | 171/2884 (5.39%) (UBQLN4)  | 0/2884 (0.0%) (UBQLN4)   |
| Ovary  | 0/583 (0.0%) (UBQLN1)      | 0/583 (0.0%) (UBQLN1)    |
|        | 15/583 (2.57%) (UBQLN2)    | 3/583 (0.51%) (UBQLN2)   |
|        | 2/583 (0.34%) (UBQLN3)     | 2/583 (0.34%) (UBQLN3)   |
|        | 59/583 (10.12%) (UBQLN4)   | 0/583 (0.0%) (UBQLN4)    |

**Table S2.** The Cancer Genome Atlas (TCGA) and non-TCGA studies for breast were analyzed in order to identify *UBQLN*'s mutations. Allele frequency is shown as percentage (%) of variants reads out of 103 total from Whole-exome sequencing of 817 breast invasive carcinoma tumor/normal pairs. Table lists all mutations with allele frequency higher than 15%.

| Gene          | Mutation Type | Protein Change | Allele Frequency (%) |
|---------------|---------------|----------------|----------------------|
| <i>UBQLN1</i> | Missense      | Q539E          | 47                   |
|               | Nonsense      | Q176*          | 31                   |
| <i>UBQLN2</i> | Missense      | V191G          | 26                   |
|               | Missense      | E42Q           | 3                    |
| <i>UBQLN3</i> | Missense      | P108S          | 26                   |
|               | Missense      | I403L          | 15                   |
| <i>UBQLN4</i> | Missense      | P108H          | 30                   |
|               | Missense      | Q422E          | 36                   |
|               | Missense      | M537T          | 32                   |
|               | Missense      | E273Q          | 19                   |
|               | Missense      | W333C          | 17                   |
|               | Missense      | S408T          | 16                   |

**Table S3.** The Cancer Genome Atlas (TCGA) and non-TCGA studies on Lung adenocarcinoma were analyzed in order to identify *UBLQN*'s mutations. Allele frequency is shown as percentage (%) of variants reads out of 150 total from Whole-exome sequencing of 660 lung ADC and 484 lung SqCC tumor/normal pairs. Table lists all mutations with allele frequency higher than 15%.

| Gene          | Mutation Type | Protein Change | Allele Frequency (%) |    |
|---------------|---------------|----------------|----------------------|----|
| <i>UBLQN1</i> | Nonsense      | G499*          | 53                   |    |
|               | Missense      | L91W           | 46                   |    |
|               | Frame_shift   | T475Nfs*27     | 46                   |    |
|               | Missense      | N577S          | 41                   |    |
|               | Missense      | R274C          | 3                    |    |
|               | Missense      | M454V          | 27                   |    |
|               | Missense      | G492E          | 27                   |    |
|               | Missense      | M235I          | 17                   |    |
|               | Missense      | L149I          | 19                   |    |
|               | Missense      | S333L          | 16                   |    |
|               | <i>UBLQN2</i> | Missense       | P440Q                | 68 |
| Missense      |               | H90N           | 54                   |    |
| Missense      |               | G481V          | 54                   |    |
| Missense      |               | G526C          | 50                   |    |
| Missense      |               | P414R          | 47                   |    |
| Missense      |               | V505F          | 43                   |    |
| Missense      |               | M271I          | 40                   |    |
| Missense      |               | M386I          | 38                   |    |
| Missense      |               | G288W          | 30                   |    |
| Missense      |               | Q173L          | 23                   |    |
| Missense      |               | S444L          | 23                   |    |
| Missense      |               | Q170H          | 22                   |    |
| Missense      |               | Q174P          | 21                   |    |
| Missense      |               | Q327H          | 20                   |    |
| Missense      |               | S140C          | 17                   |    |
| Missense      |               | S256R          | 16                   |    |
| <i>UBLQN3</i> |               | Missense       | M546I                | 88 |
|               |               | Missense       | I247L                | 79 |
|               | Missense      | A268S          | 71                   |    |
|               | Missense      | G312A          | 7                    |    |
|               | Missense      | S294L          | 51                   |    |
|               | Frame shift   | P382Hfs*20     | 54                   |    |
|               | Missense      | Q198H          | 50                   |    |
|               | Missense      | D321N          | 48                   |    |
|               | Missense      | Y258C          | 48                   |    |
|               | Missense      | R295S          | 46                   |    |
|               | Missense      | P214T          | 44                   |    |
|               | Missense      | L89Q           | 41                   |    |
|               | Missense      | E232D          | 37                   |    |
|               | Missense      | R53H           | 34                   |    |
|               | Missense      | R225L          | 31                   |    |
|               | Missense      | V240L          | 31                   |    |
|               | Missense      | A430S          | 31                   |    |
| Missense      | Q198K         | 30             |                      |    |
| Missense      | G431W         | 30             |                      |    |
| Missense      | Q636L         | 30             |                      |    |
| Missense      | A7S           | 29             |                      |    |
| Missense      | S106C         | 29             |                      |    |
| Missense      | P472T         | 29             |                      |    |
| Missense      | L566F         | 29             |                      |    |

|               |          |       |    |
|---------------|----------|-------|----|
|               | Missense | D443Y | 28 |
|               | Missense | M626G | 28 |
|               | Missense | D263H | 27 |
|               | Missense | M262I | 25 |
|               | Missense | L511F | 25 |
|               | Missense | G589V | 25 |
|               | Missense | D284Y | 23 |
|               | Missense | E101K | 21 |
|               | Missense | S36T  | 18 |
|               | Missense | Q394K | 16 |
|               | Missense | A516T | 16 |
| <i>UBQLN4</i> | Missense | P255A | 36 |
|               | Missense | M261V | 30 |
|               | Missense | M218I | 30 |
|               | Missense | S516F | 27 |
|               | Missense | V78D  | 18 |

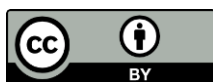

© 2020 by the authors. Licensee MDPI, Basel, Switzerland. This article is an open access article distributed under the terms and conditions of the Creative Commons Attribution (CC BY) license (<http://creativecommons.org/licenses/by/4.0/>).
